# Supplementary material for: Regulation of GLI1 by cis DNA elements and epigenetic marks
Source: PubMed Central journal article supplement (PMC6570425; doi:10.1016/j.dnarep.2019.04.011), 2019-05-02

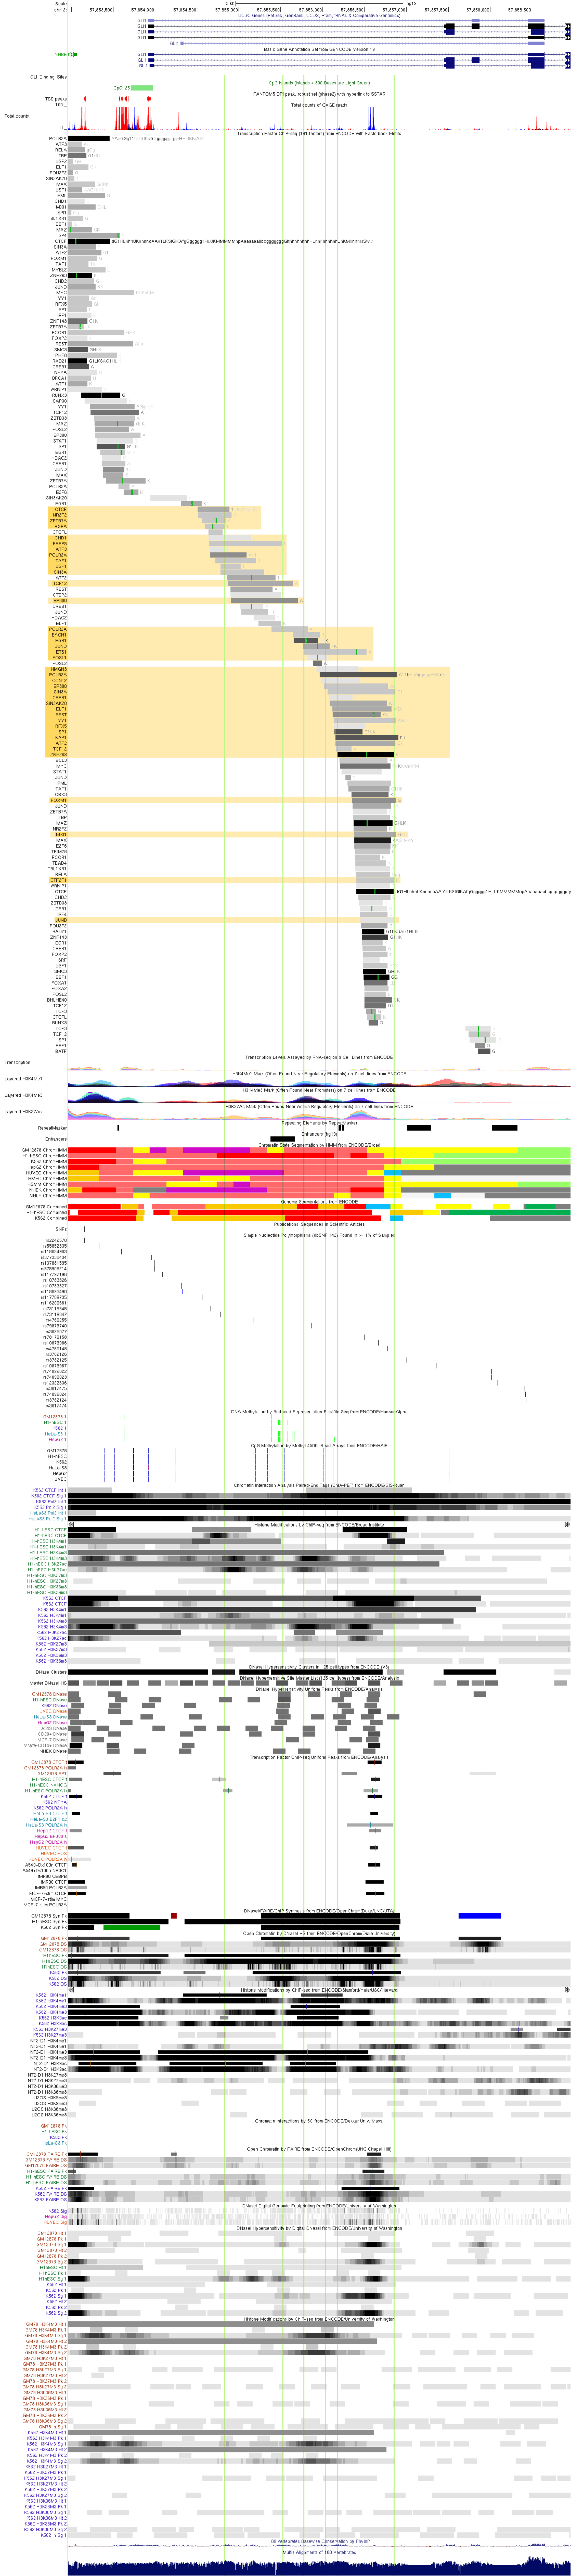

Supplement: NIHMS1529566-supplement-01.pdf [file NIHMS1529566-supplement-01.pdf]
